# Supplementary material
Source: PubMed Central journal article supplement (PMC2658212)

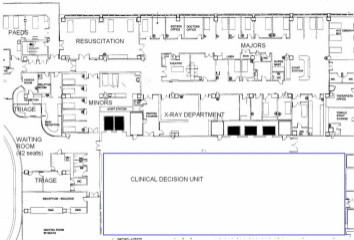

Supplement: supp_24_2_78__1.pdf [file supp_24_2_78__1.pdf]
